# Supplementary material
Source: PubMed Central journal article supplement (PMC2916977)
Supplement: NIHMS216282-supplement-01.pdf [file NIHMS216282-supplement-01.pdf]

# Supplementary Material

---

## **SF1 and SF2 helicases: family matters**

*Margaret E. Fairman-Williams, Ulf-Peter Guenther  
& Eckhard Jankowsky*

**Current Opinion in Structural Biology, 2010**



## Supplementary Figure S1

**Alignment of the helicase core of SF1 and SF2 proteins.** SF1 and SF2 proteins from *H. sapiens* (Black), *S. cerevisiae* (violet), *E. coli* (green), and representative members of Flavi-Poty- and Pox-viruses (red) were identified and retrieved from Uniprot and NCBI databases. The helicase core sequences were aligned using ClustalW [1] and Seaview [2] alignment and visualization programs. The resulting alignments were further refined by hand using structural information. For clarity, large insertions are removed from the alignment. These sections are marked by cyan highlights of the number of deleted residues. Proteins are listed in alphabetical order by organism. Helicase motif designations are indicated at the top of the alignment. Characteristic residues in each motif are highlighted in yellow.

The numbering of the motifs is based largely on the original designation by Gorbalenya and Koonin [3]. Exceptions are as follows: motifs V, Va, and Vb were designated as a single motif V, and motif IIIa, present in SF1 proteins, but absent in most SF2 proteins. Motif IIIa in the SF1 was historically termed motif IV. However, structural comparisons of SF2 and SF1 proteins revealed that the position of motif IV in SF1 differed from the position of motif IV in SF2 proteins [4]. The SF1 motif corresponding to motif IV in SF2 was then termed motif IVa. For consistency, we chose here to assign the SF2 designation to both groups, i.e., the SF1 motif IVa is labeled here motif IV as well.

Several motifs that are primarily involved in nucleic acid binding show little sequence conservation (e.g. motifs Ib, Vb). In protein families with little structural information, appropriate designation of these motifs was ambiguous. For this reason, no or only minimal highlighting of these motifs is shown. Similarly, motif Q is difficult to assign with limited structural information, and the corresponding sequence assignment should be viewed with care.

We only included certain viral SF2 proteins, even though many viruses encode SF1 and SF2 helicases [5,6]. However, sequence and structural information for most of these proteins is very limited. In contrast, the flaviviral NS3 proteins and the poxviral NPH-II helicase from vaccinia virus are among the biochemically and structurally best characterized SF2 helicases. In addition, flaviviridae NS3 and poxviridae NPH-II, together with the CI helicases from potyviridae, bear interesting resemblance in sequence to the DEAH/RHA family. We therefore included in the alignment two viral proteins from each of these virus types (poxviruses, potyviruses, and three

flavivirus families). Comparing these well characterized proteins to other SF2 helicases may provide valuable insight into the function of other SF2 proteins.

*Note: Because of the large size of the alignment layout, it is best viewed and printed at 400 % of its original size.*

| SF                   | 1              | 2              |           |        |                |       |         |       |                                              |        |               |       |       |       |       |                                                                      |                |       |       |                          |                |                |              |       |
|----------------------|----------------|----------------|-----------|--------|----------------|-------|---------|-------|----------------------------------------------|--------|---------------|-------|-------|-------|-------|----------------------------------------------------------------------|----------------|-------|-------|--------------------------|----------------|----------------|--------------|-------|
| Family               | UvrD/Rep       | Pif1-like      | Upt1-like |        |                |       |         |       |                                              |        |               |       |       |       |       |                                                                      |                |       |       | Swi/Snf                  |                |                |              |       |
| <i>S. cerevisiae</i> | Srs2p<br>Hmi1p | Pif1p<br>Rrm3p | Sen1p     | Ljpf1p | Hcs1p          | Dna2p | Mit1p   | Wdt1p | Rad54p                                       | Rdh54p | Rad26p        | Isw1p | Isw2p | Chd1p | Sih1p | Yrk8p                                                                | Ino80p         | Yab9p | Swr1p | Rad16p<br>Rad5p<br>Y427p | Y427p          |                |              |       |
| Human                | FBH<br>LBA1    | HELB           | PIF1      | SETX   | BP160<br>ZNFX1 | UPF1  | IGHMBP2 | DNA2  | MOV10<br>MOV10L1<br>HEL2<br>PRZ85<br>pMRDFL1 | BTAF1  | Rad54<br>ATRX | RA54B | ERCC6 | SMAC1 | SMAC5 | CHD1<br>CHD2<br>CHD3<br>CHD4<br>CHD5<br>CHD6<br>CHD7<br>CHD8<br>CHD9 | SMCA2<br>SMCA4 | HELLS | INOC1 | SMRCD                    | EP400<br>SRCAP | SMAL1<br>ZRAB3 | HLTF<br>TTF2 | SHRPH |

| SF                   | 2                                | DEAH/RHA  |       |       |       |       |          |        |        |               |       | RIG-I-like |                |                |        | RecQ-like |       |                        |       |       |                                       |       |
|----------------------|----------------------------------|-----------|-------|-------|-------|-------|----------|--------|--------|---------------|-------|------------|----------------|----------------|--------|-----------|-------|------------------------|-------|-------|---------------------------------------|-------|
| Family               | Rad3/Xpd                         | Ski2-like |       |       |       |       | DEAH/RHA |        |        |               |       | RIG-I-like |                |                |        | RecQ-like |       |                        |       |       |                                       |       |
| <i>S. cerevisiae</i> | Chp1p                            | Rad3p     | Skv2p | Mtr4p | Hfm1p | Sih1p | Bnr2p    | Pip22p | Pip16p | Pip43         | Dhr2p | Dhr1p      | Yl419p         | Pip2p          | Moh1p  | Sqs1p     | Hfq1p |                        |       |       |                                       |       |
| Human                | DDX11<br>DDX12<br>RTEL1<br>FANCI | ERCC2     | SKIV2 | SKL2L | HFM1  | HL308 | HELC1    | US200  | DDX60  | DHX6<br>DHX16 | DHX36 | DHX15      | DHX33<br>DHX35 | DHX37<br>DHX40 | YL419p | DOX1      | DHX34 | RIG-I<br>IFIH1<br>LPG2 | FANCM | Dicer | Sqs1p<br>RecQ1<br>BLM<br>WRN<br>RecQ4 | RecQ5 |

| SF                   | 2              | DEAD-box  |           |                |          |           |          |                         |                |          |           |       |       |       |       |       |        |       |                        |                        |                |       |       |       |
|----------------------|----------------|-----------|-----------|----------------|----------|-----------|----------|-------------------------|----------------|----------|-----------|-------|-------|-------|-------|-------|--------|-------|------------------------|------------------------|----------------|-------|-------|-------|
| Family               | UvrD/Rep       | Pif1-like | Upt1-like | Swi/Snf        | Rad3/Xpd | Ski2-like | DEAH/RHA | RIG-I-like              | RecQ-like      | DEAD-box | RecQ-like |       |       |       |       |       |        |       |                        |                        |                |       |       |       |
| <i>S. cerevisiae</i> | Pip5p          | Dop9p     | Dop6p     | Tif1p/Tif2p    | Failp    | Dhr1p     | Dop5p    | Sub2p                   | Has1p          | Mss116p  | Dop4p     | Sop4p | Dop7p | Rtp3p | Dop8p | Dra1p | Dop10p | Dop3p | Ded1p<br>Dbe1p         | Dop2p                  | Pip28p         | Mak5p | Rok1p | Mtr4p |
| Human                | DDX46<br>DDX42 | DDX56     | DDX51     | DDX21<br>DDX50 | DDX2A    | RecQ5     | DDX6     | DDX19<br>DDX20<br>DDX25 | DDX39<br>UAP56 | DDX18    | DDX10     | DDX55 | DDX31 | DDX47 | DDX49 | DDX27 | DDX54  | DDX17 | DDX3Y<br>DDX3K<br>DDX4 | DDX53<br>DDX43<br>DDX5 | DDX23<br>DDX41 | DDX24 | DDX52 | DDX28 |

Supplementary table TS1. List of eukaryotic proteins used in the SF1/2 alignment. Proteins from *S. cerevisiae* and *H. sapiens* are listed by family, with homologous/orthologous proteins shown in the same column in each subtable. SUV3 homologs from both organisms could not be assigned to a family.

| SF             | 1                           | 2            |              |         |              |           |              |            |                     |                                    |                     |
|----------------|-----------------------------|--------------|--------------|---------|--------------|-----------|--------------|------------|---------------------|------------------------------------|---------------------|
| Family         | UvrD/Rep                    | Pif1-like    | Upt1-like    | Swi/Snf | Rad3/Xpd     | Ski2-like | DEAH/RHA     | RIG-I-like | RecQ-like           | DEAD-box                           | RecQ-like           |
| <i>E. Coli</i> | RecB<br>Rep<br>UvrD<br>HsdR | Ttal<br>RecD | Z1202<br>UL1 | RapA    | DinG<br>YoaA | C6KGE6    | HrpA<br>HrpB |            | RecG<br>PriA<br>MFD | DbpA<br>RnB<br>Dead<br>RHE<br>SrmB | RecG<br>PriA<br>MFD |

Supplementary table TS2. List of SF1/2 proteins from *E. coli* used in the alignment. The highly similar tye III restriction enzymes BPP1 and BP151 could not be assigned to any family.

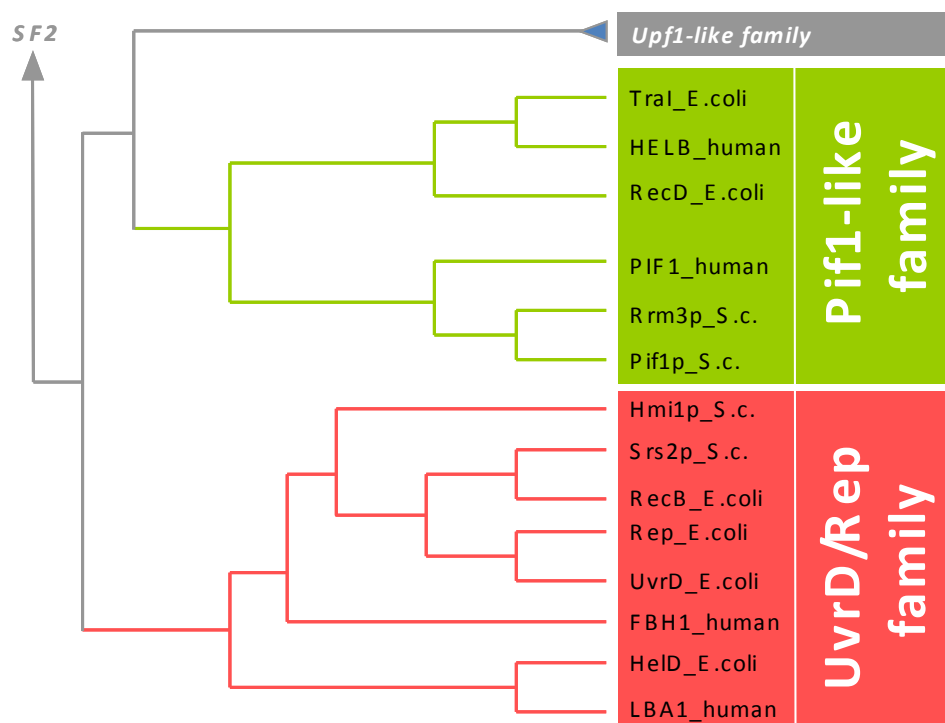

### Supplementary Figure S2

**Cladogram for UvrD/Rep and Pif1-like families.** The cladogram shows an example of the phylogenetic analyses for two SF1 protein families, based on the sequence alignment of the helicase core (**Suppl. Fig.S1**). The figure shows the result of an analysis using distance- and character-based program options (BioNJ, protpars) of Seaview4 [7,8]. Consistent grouping of proteins into family clusters, such as those seen here, were obtained with various phylogenetic methods. However, topologies of phylogenetic trees varied on occasion, dependent on the algorithm used. This variation is presumably due to the large number of unavoidable sequence gaps in the alignment (**Suppl. Fig.S1**). In several instances, branching was not supported by high bootstrap values. Consequently, the evolutionary relationship between individual family members and the phylogenetic relationship between the families (**Fig.1**) should thus be viewed with care. Nonetheless, the cladograms revealed several phylogenetic relations that are in excellent with structural data (**Figs.3,4**), for example the close relation of the NS3/NPH-II group to the DEAH/RHA proteins (**Figs.3,4**).



**Supplementary Figure S3**

**Characteristic sequence motifs for the individual SF1 and SF2 protein families.** Sequence conservation on the family/group level of the characteristic helicase motifs is shown as sequence logo [9]. The height of the amino acid symbols reflects the sequence conservation and the color their chemical properties: polar - green, basic - blue, acidic – red, and hydrophobic -black. Sequence positions that are only conserved within a given family/group are not displayed.



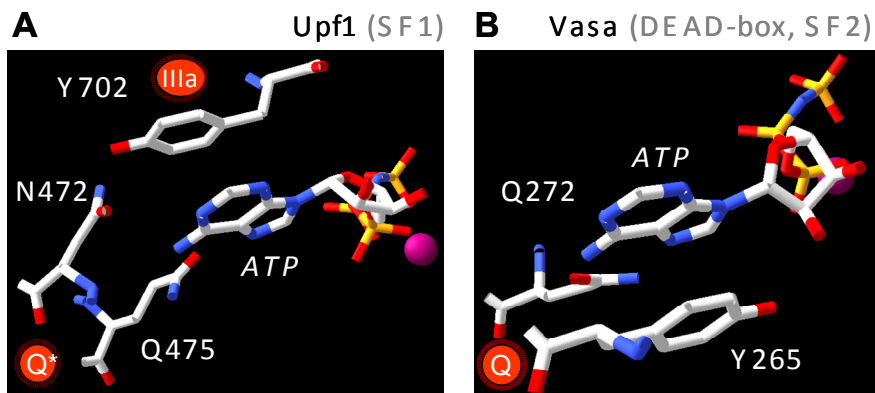

### Supplementary Figure S4

**The putative adenine stacking platform in motif IIIa of SF1 proteins.** Sidechains of conserved residues that provide specificity for the adenosine base are shown from similar angles in structures of the SF1 helicase UPF1 [10] (**A**) and SF2 DEAD-box protein *Vasa* [11] (**B**). Atoms are colored as follows: C – white, O – red and N – blue. Residues of the Q-motif that contact the adenosine in a specific manner are positioned similarly in both structures (Q475, N472 in UPF1; Q272 in *Vasa*). A conserved aromatic residue stacking on the adenine base is located in motifs IIIa in UPF1, but in the Q-motif in *Vasa* (Y702 in UPF1, Y265 in *Vasa*). Notably, this residue approaches the adenine base from opposite direction in SF1 (top) and SF2 (bottom). In addition, motif IIIa contains a highly conserved arginine.

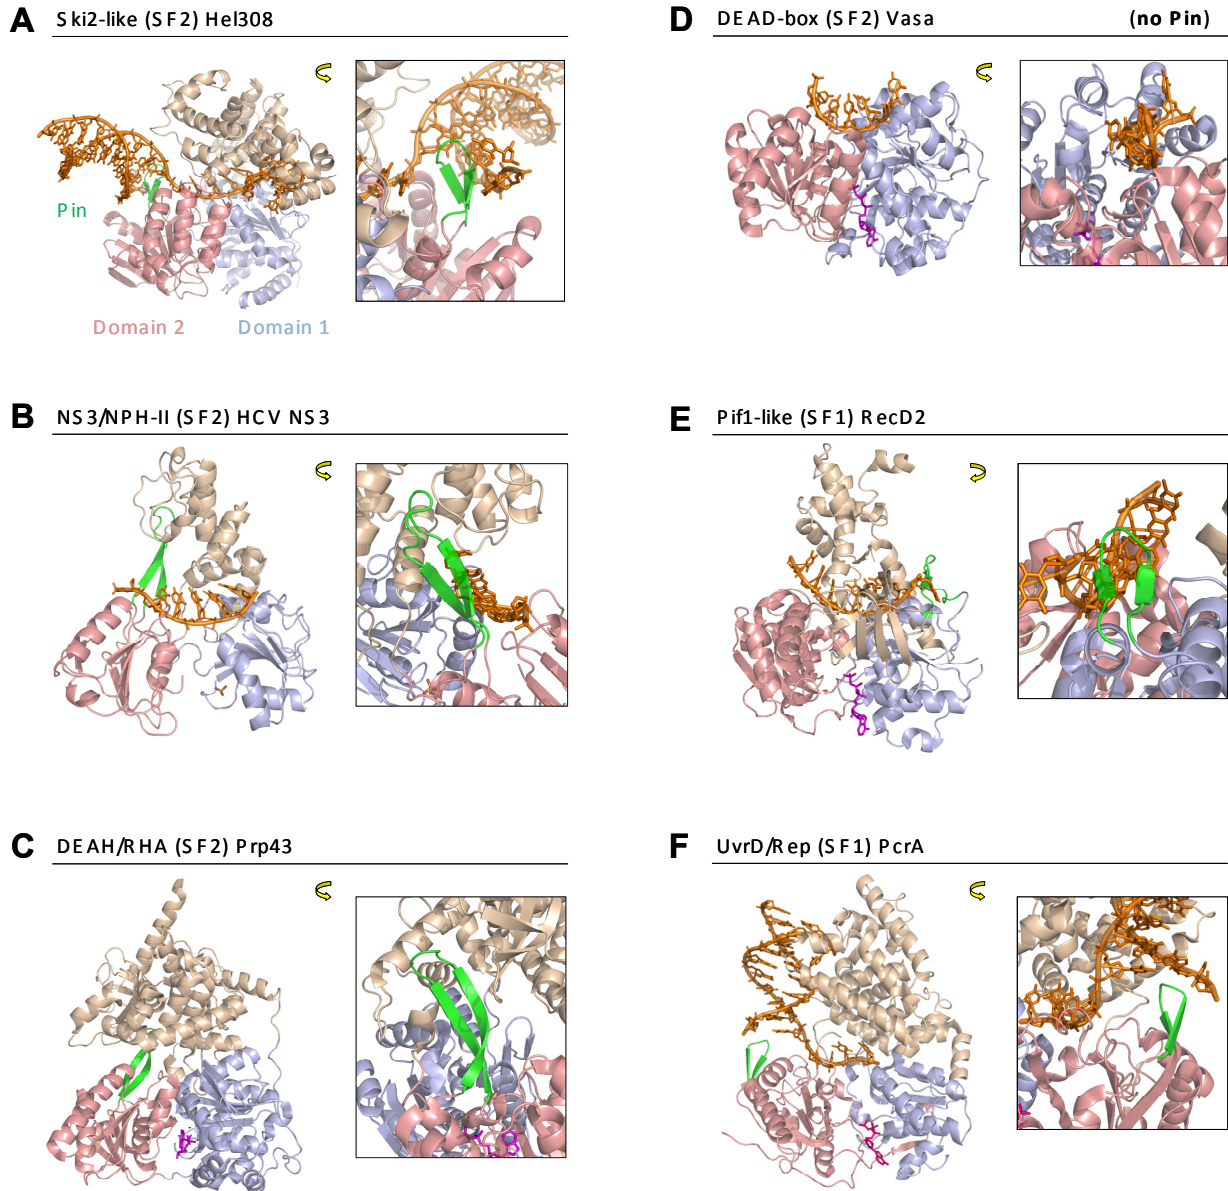

### Supplementary Figure S5

**Characteristic “pins” in structures of SF1 and SF2 helicases.** Representative structures of proteins from different SF2 and SF1 families, containing “pin” domains, a prominent  $\beta$ -hairpin. The helicase domain 1A is blue, 2A pink, accessory/ inserted domains are light-beige. The “pin” is green in all structures. ATP and nucleic acid, are magenta or orange, respectively. In the left panels, all structures are oriented as shown in **Fig.4**. The right panels show the structures rotated by roughly  $90^\circ$  (indicated by a yellow arrow), zoomed into the region containing the “pin”.

**D** shows the DEAD-box protein Vasa as example for a family lacking a “pin”. The following structures are shown: **(A)** Hel308 (*Archaeoglobus fulgidus*) [12], **(B)** HCV NS3 (*Hepatitis C virus*) [13], **(C)** Prp43p (*S. cerevisiae*) [14], **(D)** Vasa (*D. melanogaster*) [15], **(E)** RecD2 (*D. radiodurans*) [15], **(F)** PcrA (*B. stearothermophilus*) [16]. We note that Rad3/XPD proteins, instead of a  $\beta$ -hairpin, have a 2-helix insertion in a similar location between motifs Va and VI [17]. It is unclear whether this motif serves a function similar to the “pin”.

## REFERENCES

1. Larkin MA, Blackshields G, Brown NP, Chenna R, McGettigan PA, McWilliam H, Valentin F, Wallace IM, A. W, R. L, et al.: **Clustal W and Clustal X version 2.0.** *Bioinformatics* 2007, **23**:2947-2948.
2. Gouy M, Guindon S, Gascuel O: **SeaView version 4: A multiplatform graphical user interface for sequence alignment and phylogenetic tree building.** *Mol. Biol. Evol.* 2010, **27**:221-224.
3. Gorbalenya AE, Koonin EV: **Helicases: amino acid comparisons and structure-function relationships.** *Curr Opin Struct Biol* 1993, **3**:419-429.
4. Korolev S, Yao N, Lohman TM, Weber PC, Waksman G: **Comparisons between the structures of HCV and Rep helicases reveal structural similarities between SF1 and SF2 super-families of helicases.** *Protein Sci.* 1998, **7**:605-610.
5. Kadare G, Haenni AL: **Virus-encoded RNA helicases.** 1997, *J. Virol*:2583-2590.
6. Frick DN, Lam AM: **Understanding helicases as a means of virus control.** *Curr. Pharm. Des.* 2006, **12**:1315-1338.
7. Gascuel O: **BIONJ: an improved version of the NJ algorithm based on a simple model of sequence data.** *Mol. Biol. Evol.* 1997, **14**:685-695.
8. Felsenstein J: **PHYLIP (Phylogeny Inference Package) version 3.52.** *distributed by the author* 1993, Department of Genome Sciences, University of Washington, Seattle.
9. Crooks GE, Hon G, Chandonia JM, Brenner SE: **WebLogo: a sequence logo generator.** *Genome Res.* 2004, **14**:1188-1190.
10. Clerici M, Mourão A, Gutsche I, Gehring NH, Hentze MW, Kulozik A, Kadlec J, Sattler M, Cusack S: **Unusual bipartite mode of interaction between the nonsense-mediated decay factors, UPF1 and UPF2.** *EMBO J.* 2009, **28**:2293-2306.
11. Sengoku T, Nureki O, Nakamura A, Kobayashi S, Yokoyama S: **Structural basis for RNA unwinding by the DEAD-box protein Drosophila Vasa.** *Cell* 2006, **125**:287-300.
12. Büttner K, Nehring S, Hopfner KP: **Structural basis for DNA duplex separation by a superfamily-2 helicase.** *Nat. Struct. Biol.* 2007, **14**:647-352.
13. Yao N, Reichert P, Taremi SS, Prosis WW, Weber PC: **Molecular views of viral polyprotein processing revealed by the crystal structure of the hepatitis C virus bifunctional protease-helicase.** *Structure* 1999, **15**:1353-1363.
14. He Y, Andersen GR, Nielsen KH: **Structural basis for the function of DEAH helicases.** *EMBO Rep.* 2010:in press.
15. Singleton MR, Dillingham MS, Gaudier M, Kowalczykowski SC, Wigley DB: **Crystal structure of RecBCD enzyme reveals a machine for processing DNA breaks.** *Nature* 2004, **432**:187-193.
16. Velankar SS, Soultanas P, Dillingham MS, Subramanya HS, Wigley DB: **Crystal structures of complexes of PcrA DNA helicase with a DNA substrate indicate an inchworm mechanism.** *Cell* 1999, **97**:75-84.
17. Fan L, Fuss JO, Cheng QJ, Arvai AS, Hammel M, Roberts VA, Cooper PK, Tainer JA: **XPD helicase structures and activities: insights into the cancer and aging phenotypes from XPD mutations.** *Cell* 2008, **133**:789-800.
